# Supplementary material for: Multi-stakeholder perspectives of locally commissioned enhanced optometric services
Source: PubMed Central journal article supplement — BMJ Open. 2016 Oct 25;6(10):e011934. doi: 10.1136/bmjopen-2016-011934 (PMC5093366; doi:10.1136/bmjopen-2016-011934), 2016-10-25
Supplement: bmjopen-2016-011934supp1.pdf [file bmjopen-2016-011934supp1.pdf]

## **GLAUCOMA REFERRAL REFINEMENT SCHEME - PATIENT SURVEY**

Please answer the questions below by putting an **X** in ONE BOX for each question. We will keep your answers completely confidential.

### **1. Why did you attend for an initial eye examination?**

- ☐ Reminder/recall received
- ☐ Vision related problem
- ☐ Non-vision related problem
- ☐ Other (please state \_\_\_\_\_)

### **2. How long did you wait to get an appointment with the Glaucoma Referral Refinement Scheme optician (Optometrist)?**

- ☐ Within two weeks
- ☐ Within one month
- ☐ More than one month

### **3. How convenient was the appointment?**

- ☐ Very convenient
- ☐ Fairly convenient
- ☐ Not very convenient
- ☐ Not at all convenient

### **4. Overall were you satisfied with your visit?**

- ☐ Yes
- ☐ No

### **5. How satisfied are you with the location of the optician (was it easy to get to?)**

- ☐ Very satisfied
- ☐ Fairly satisfied
- ☐ Not very satisfied
- ☐ Not at all satisfied

### **6. How satisfied are you with the optician's premises / environment?**

- ☐ Very satisfied
- ☐ Fairly satisfied
- ☐ Not very satisfied
- ☐ Not at all satisfied

### **7. How good was the optician at each of the following?**

#### **Giving you enough time**

- ☐ Very good
- ☐ Good
- ☐ Neither good nor poor
- ☐ Poor
- ☐ Very poor

#### **Listening to you**

- ☐ Very good
- ☐ Good
- ☐ Neither good nor poor
- ☐ Poor
- ☐ Very poor

#### **Explaining tests and treatments**

- ☐ Very good
- ☐ Good
- ☐ Neither good nor poor
- ☐ Poor
- ☐ Very poor

#### **Involving you in decisions about your care**

- ☐ Very good
- ☐ Good
- ☐ Neither good nor poor
- ☐ Poor
- ☐ Very poor

#### **Treating you with care and concern**

- ☐ Very good
- ☐ Good
- ☐ Neither good nor poor
- ☐ Poor
- ☐ Very poor

### **8. Did you have confidence and trust in the optician you saw?**

- ☐ Yes, definitely
- ☐ Yes, to some extent
- ☐ No, not at all

☐ Don't know / can't say

---

---

---

---

---

**9. If you have any other comments on how we can improve the Glaucoma Referral Refinement Scheme, please write them here:**

---

---

---

---

---

---

**10. Would you be willing to be telephoned to discuss your visit to the optician in more detail?**

☐ Yes

Please give your telephone/mobile number:

---

☐ No
